# Supplementary material
Source: publisher site journal article supplement (https://www.dovepress.com/article/506724)
Supplement: Supplementary file 1 [file 08_Feb_2025_Supporting_information_2.docx]

**Table S1: Association between knowledge of women about BC and duration of the disease on presentation**

| **Knowledge of BC women** | **Duration of breast cancer** | | | |  |  |  |  |
| --- | --- | --- | --- | --- | --- | --- | --- | --- |
| **<3 months** | **%** | **≥ 3months** | **%** | **Total** | **%** | **Chi2** | ***p*-value** |
| **Awareness about BC condition (n=249)** | | |  |  |  |  |  |  |
| Unaware | 5 | 20.0 | 20 | 80.0 | 25 | 10.0 | 0.304 | 0.581 |
| Aware | 56 | 25.0 | 168 | 75.0 | 224 | 90.0 |  |  |
| Total | 61 | 24.5 | 188 | 75.5 | 249 | 99.6 |  |  |
| **Have you thought your condition was benign (n=250)** | | | |  |  |  |  |  |
| Not benign | 7 | 41.2 | 10 | 58.8 | 17 | 6.8 | 2.499* | 0.114 |
| Benign | 54 | 23.2 | 179 | 76.8 | 233 | 93.2 |  |  |
| Total | 61 | 24.4 | 189 | 75.6 | 250 | 100.0 |  |  |
| **Have you thought your condition was preventable (n=250)** | | | | |  |  |  |  |
| Not preventable | 9 | 18.8 | 39 | 81.3 | 48 | 19.2 | 3.567 | 0.168 |
| No Idea | 31 | 22.5 | 107 | 77.5 | 138 | 55.2 |  |  |
| Preventable | 21 | 32.8 | 43 | 67.2 | 64 | 25.6 |  |  |
| Total | 61 | 24.4 | 189 | 75.6 | 250 | 100.0 |  |  |
| **Have you thought your condition was contagious (n=250)** | | | | |  |  |  |  |
| Not contagious | 52 | 24.3 | 162 | 75.7 | 214 | 85.6 | 0.058* | 0.971 |
| No Idea | 7 | 25.9 | 20 | 74.1 | 27 | 10.8 |  |  |
| Contagious | 2 | 22.2 | 7 | 77.8 | 9 | 3.6 |  |  |
| Total | 61 | 24.4 | 189 | 75.6 | 250 | 100.0 |  |  |
| **Awareness about BC Self-Examination (BSE) (n=250)** | | | | |  |  |  |  |
| Unaware | 34 | 21.1 | 127 | 78.9 | 161 | 64.4 | 2.641 | 0.104 |
| Aware | 27 | 30.3 | 62 | 69.7 | 89 | 35.6 |  |  |
| Total | 61 | 24.4 | 189 | 75.6 | 250 | 100.0 |  |  |
| **False negative results of FNAC (n=250)** | | |  |  |  |  |  |  |
| No | 61 | 25.5 | 178 | 74.5 | 239 | 95.6 | 6.315* | 0.012 |
| Yes | 0 | 0.0 | 11 | 100.0 | 11 | 4.4 |  |  |
| Total | 61 | 24.4 | 189 | 75.6 | 250 | 100.0 |  |  |

*Likelihood ratio

**Table S2: Association between patients characteristics and duration of BC disease on presentation**

|  | **Duration of BC on presentation** | | | | |  | |  | |  | |  |
| --- | --- | --- | --- | --- | --- | --- | --- | --- | --- | --- | --- | --- |
| **Characteristics** | **< 3 months** | **%** | **≥ 3 months** | **%** | **Total** | | **%** | | **Chi2** | | ***p*-value** | |
| **Age (n=250)** |  |  |  |  |  | |  | |  | |  | |
| < 40 years | 10 | 18.9 | 43 | 81.1 | 53 | | 21.2 | | 1.116 | | 0.291 | |
| ≥40 years | 51 | 25.9 | 146 | 74.1 | 197 | | 78.8 | |  | |  | |
| Total | 61 | 24.4 | 189 | 75.6 | 250 | | 100.0 | |  | |  | |
| **Residence (n=250)** |  |  |  |  |  | |  | |  | |  | |
| Rural | 25 | 24.8 | 76 | 75.2 | 101 | | 40.4 | | 0.011 | | 0.915 | |
| Urban | 36 | 24.2 | 113 | 75.8 | 149 | | 59.6 | |  | |  | |
| Total | 61 | 24.4 | 189 | 75.6 | 250 | | 100.0 | |  | |  | |
| **Marital status(n=250)** | |  |  |  |  | |  | |  | |  | |
| Married | 47 | 25.3 | 139 | 74.7 | 186 | | 74.4 | | 0.297 | | 0.586 | |
| Not married | 14 | 21.9 | 50 | 78.1 | 64 | | 25.6 | |  | |  | |
| Total | 61 | 24.4 | 189 | 75.6 | 250 | | 100.0 | |  | |  | |
| **Educational level (n=250)** | |  |  |  |  | |  | |  | |  | |
| Illiterate | 23 | 22.1 | 81 | 77.9 | 104 | | 41.6 | | 0.763 | | 0.683 | |
| Below university | 24 | 24.7 | 73 | 75.3 | 97 | | 38.8 | |  | |  | |
| University | 14 | 28.6 | 35 | 71.4 | 49 | | 19.6 | |  | |  | |
| Total | 61 | 24.4 | 189 | 75.6 | 250 | | 100.0 | |  | |  | |
| **Family history of BC (n=250)** | |  |  |  |  | |  | |  | |  | |
| Negative | 46 | 23.1 | 153 | 76.9 | 199 | | 79.6 | | 0.872 | | 0.350 | |
| Positive | 15 | 29.4 | 36 | 70.6 | 51 | | 20.4 | |  | |  | |
| Total | 61 | 24.4 | 189 | 75.6 | 250 | | 100.0 | |  | |  | |
| **Having children (n=250)** | |  |  |  |  | |  | |  | |  | |
| No | 13 | 23.6 | 42 | 76.4 | 55 | | 22.0 | | 0.022 | | 0.881 | |
| Yes | 48 | 24.6 | 147 | 75.4 | 195 | | 78.0 | |  | |  | |
| Total | 61 | 24.4 | 189 | 75.6 | 250 | | 100.0 | |  | |  | |
